# Supplementary material
Source: ML conference proceedings conference paper supplement (https://openaccess.thecvf.com/content/ICCV2021/html/Gadde_Detail_Me_More_ICCV_2021_paper.html)
Supplement: Supplementary file 1 [file Gadde_Detail_Me_More_ICCV_2021_supplemental.pdf]

## Detail Me More: Improving GAN’s photo-realism of complex scenes

Raghudeep Gadde  
Amazon

Qianli Feng  
Amazon

Aleix M Martinez  
Amazon

Here we provide more qualitative results using the proposed DMM approach. Figure 4 shows sample images from the DMM-StyleGAN2 model trained on DeepRooms dataset. In order to compare the quality of samples, we show results from five GAN models including the proposed DMM-StyleGAN2 on the DeepRooms, Cityscapes and LSUN-livingroom datasets in Figures 5, 6 and 7.

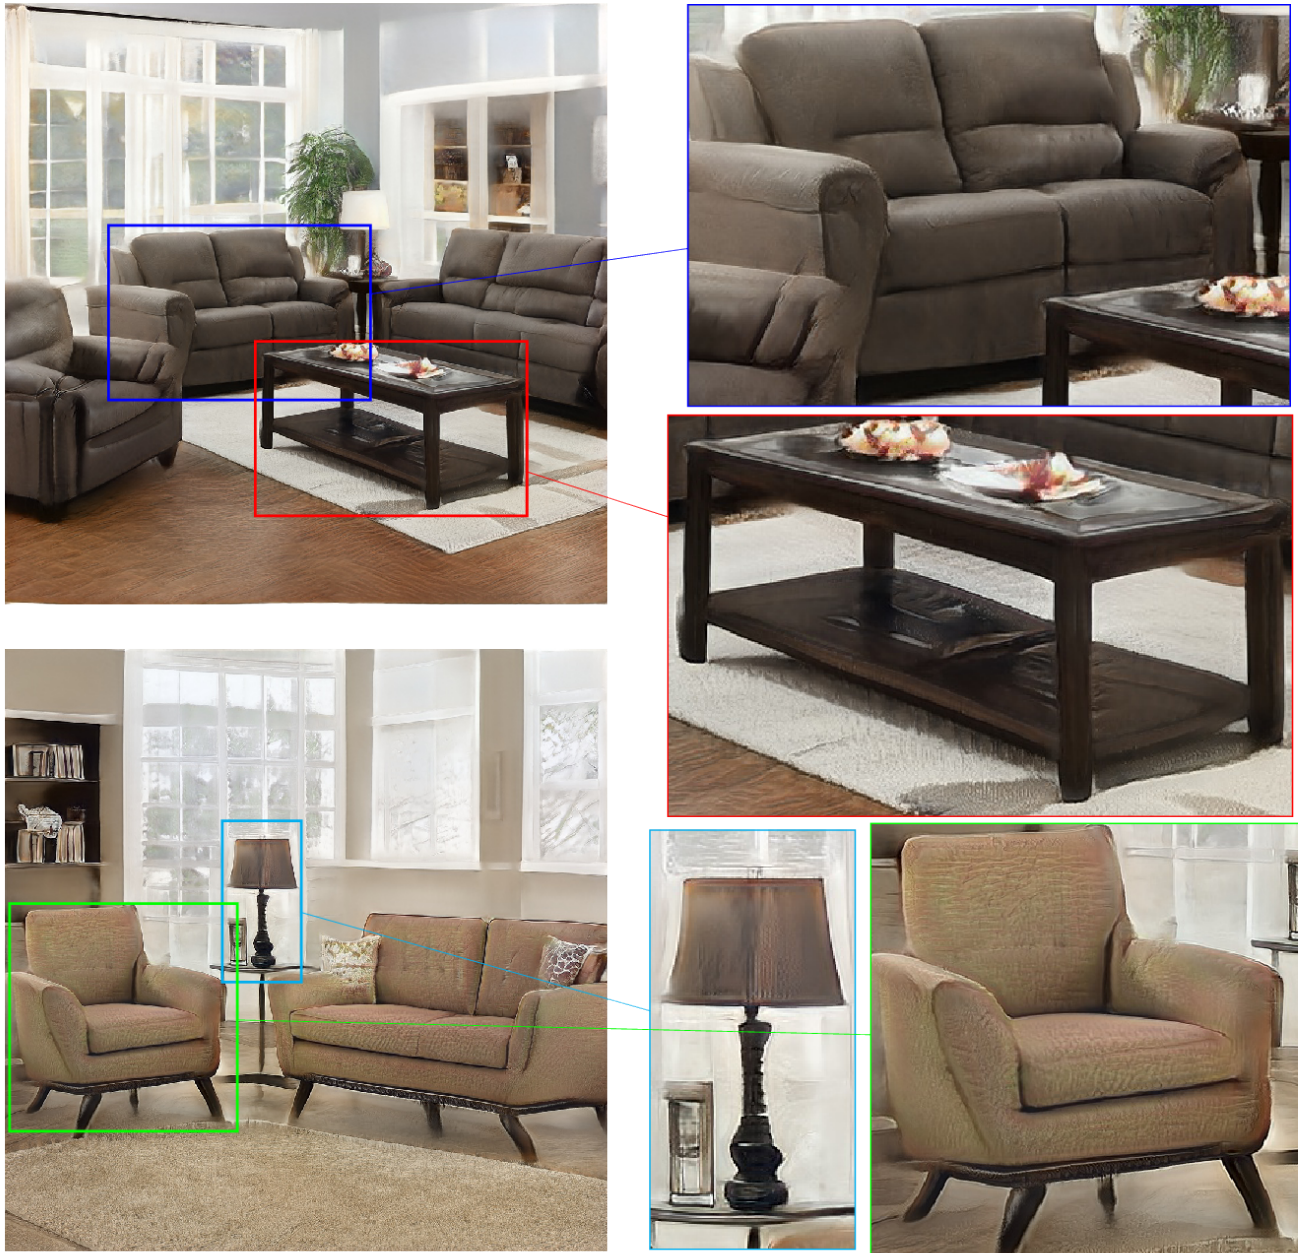

Figure 4: **Qualitative results on DeepRooms dataset.** Samples at  $1024 \times 1024$  from the proposed DMM-StyleGAN2 model. Notice the photo-realism around objects.



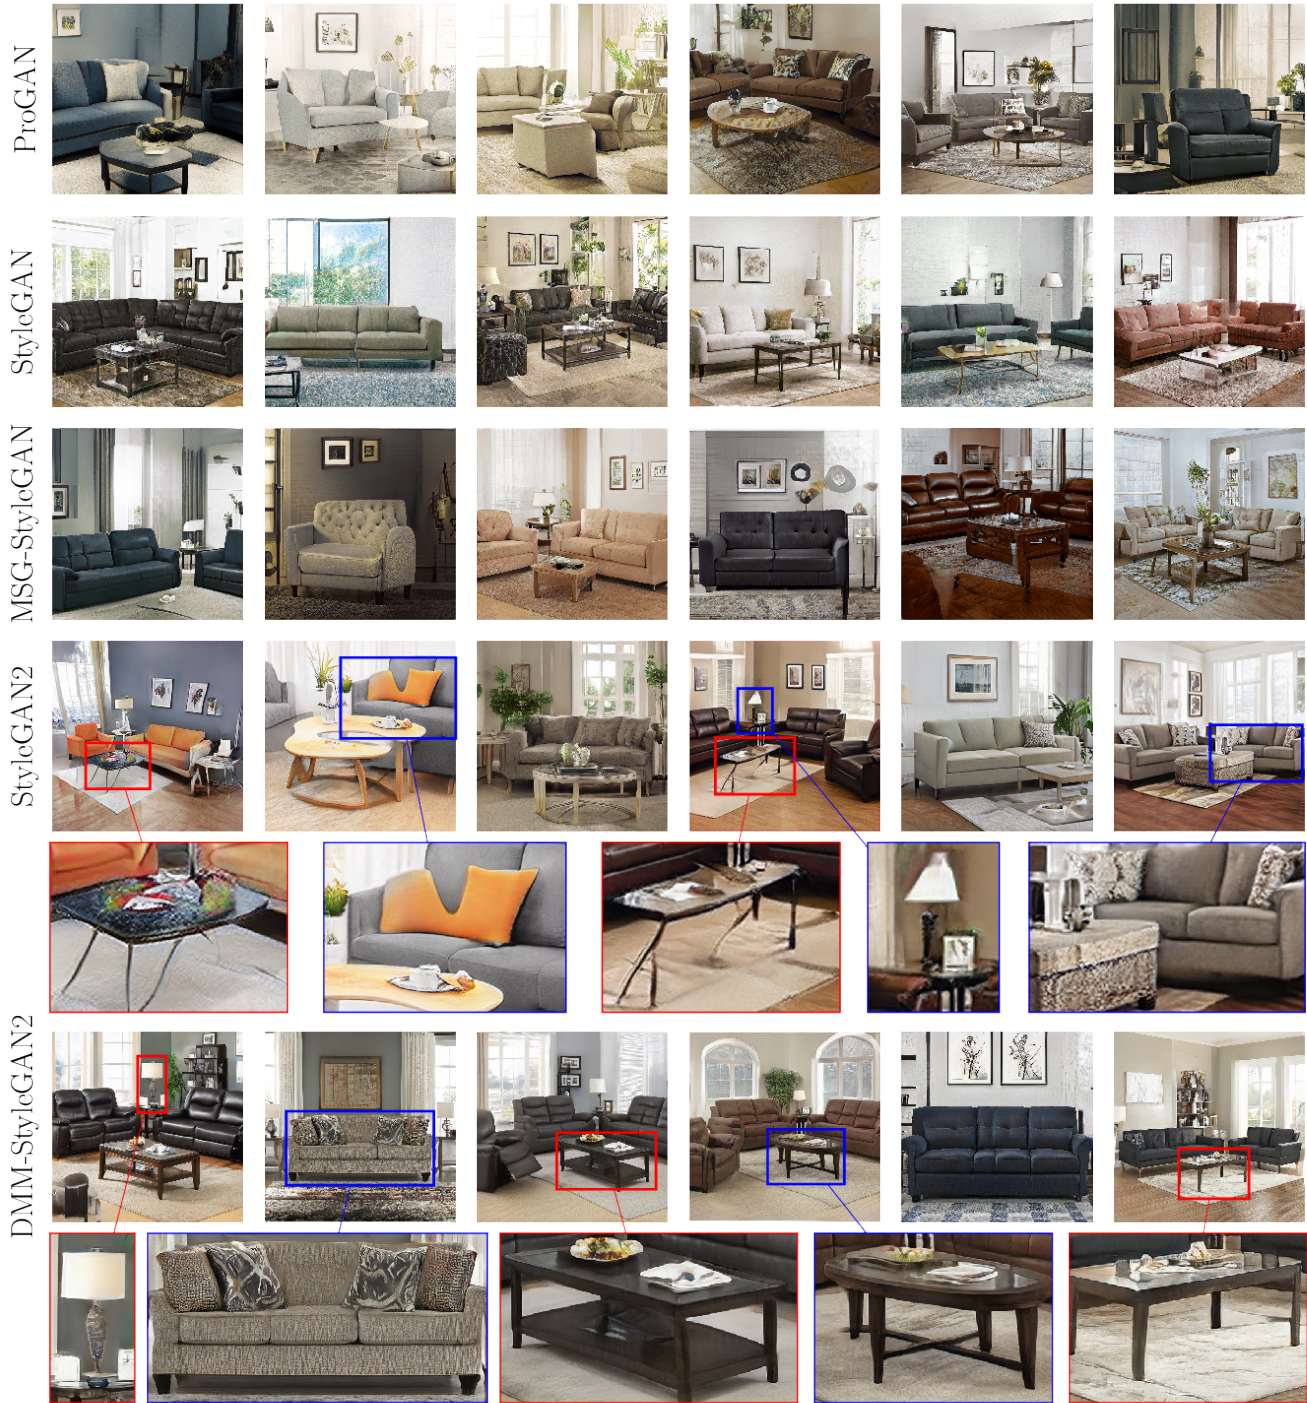

Figure 5: **Comparative results on DeepRooms dataset.** Each row from the top shows samples at  $1024 \times 1024$  resolution drawn from ProGAN, StyleGAN, MSG-StyleGAN, StyleGAN2 and proposed DMM-StyleGAN2 models. For easy comparison we show zoom-ups of objects in images from StyleGAN2 and DMM-StyleGAN2.



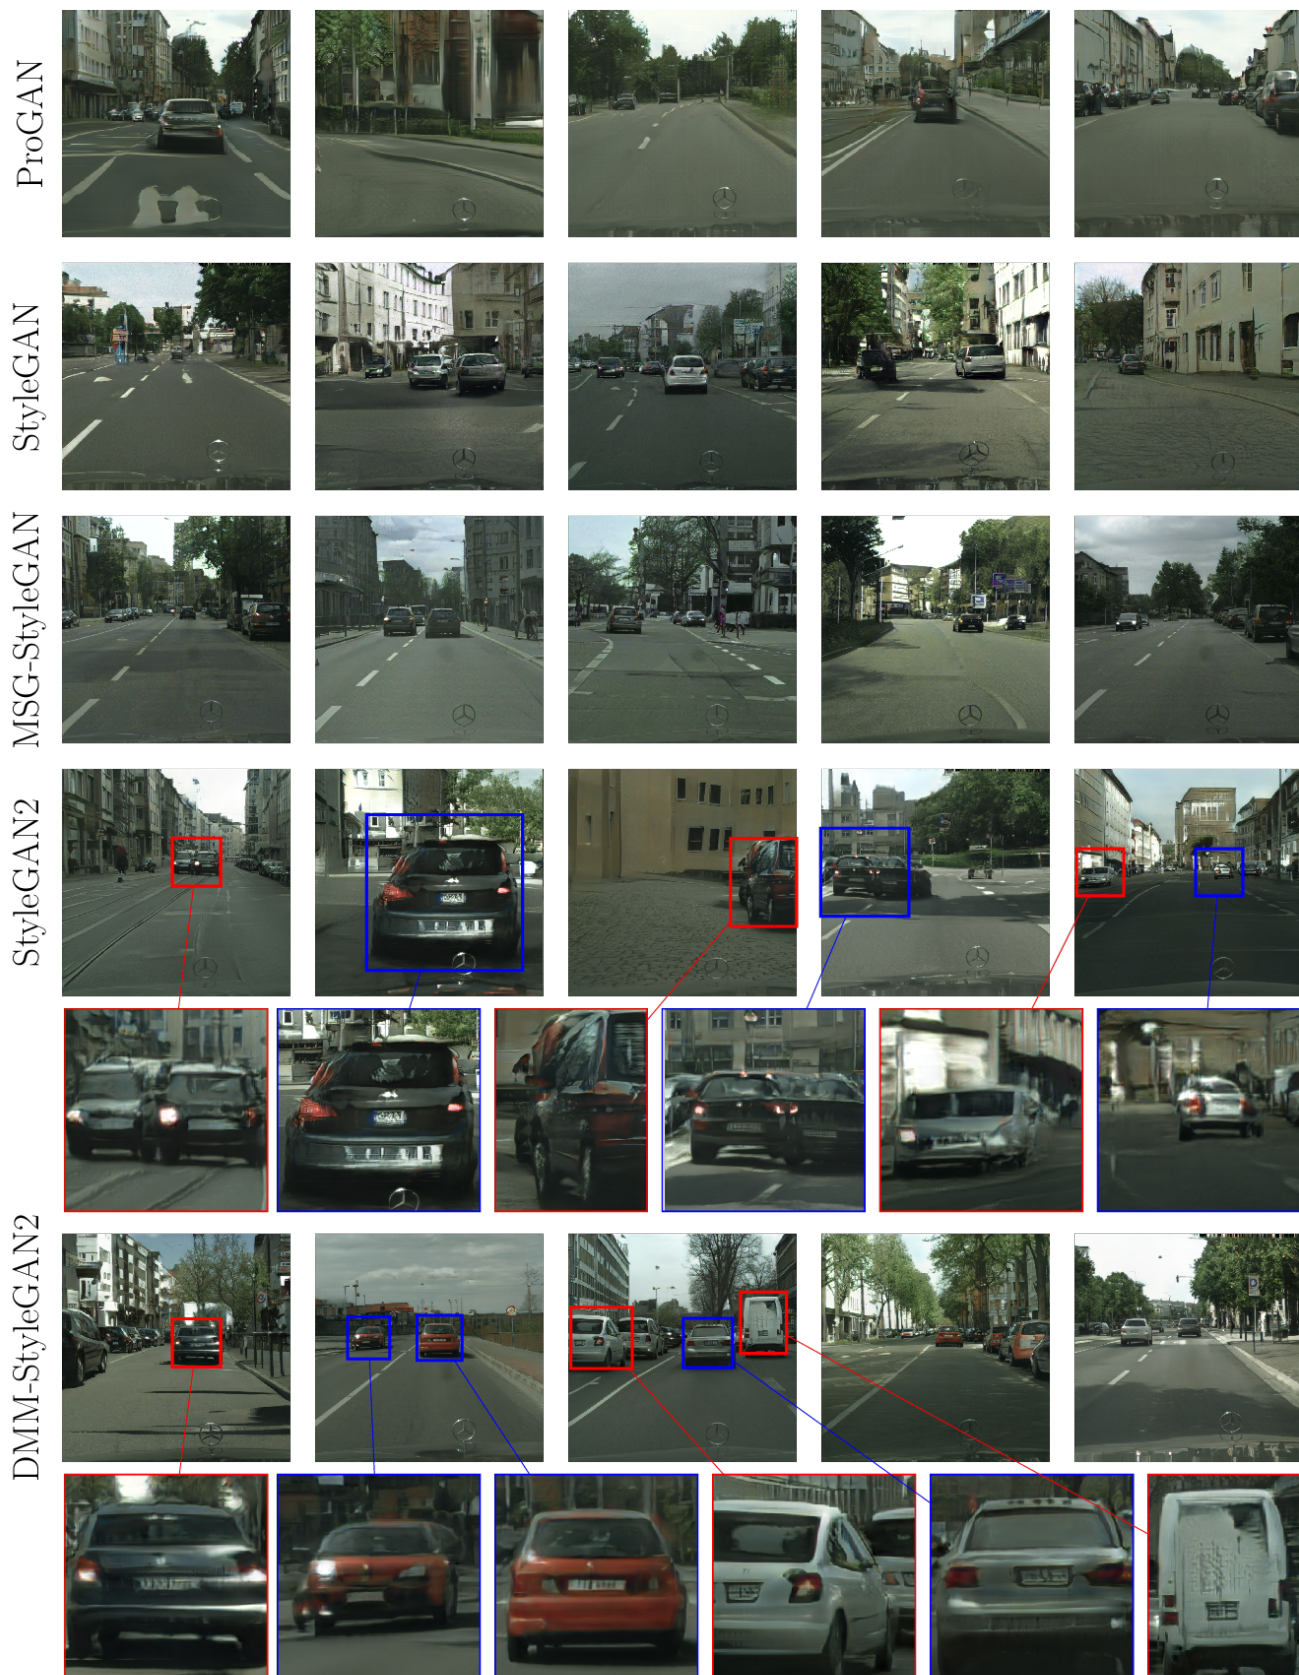

Figure 6: Comparative results on Cityscapes dataset at  $1024 \times 1024$  resolution.



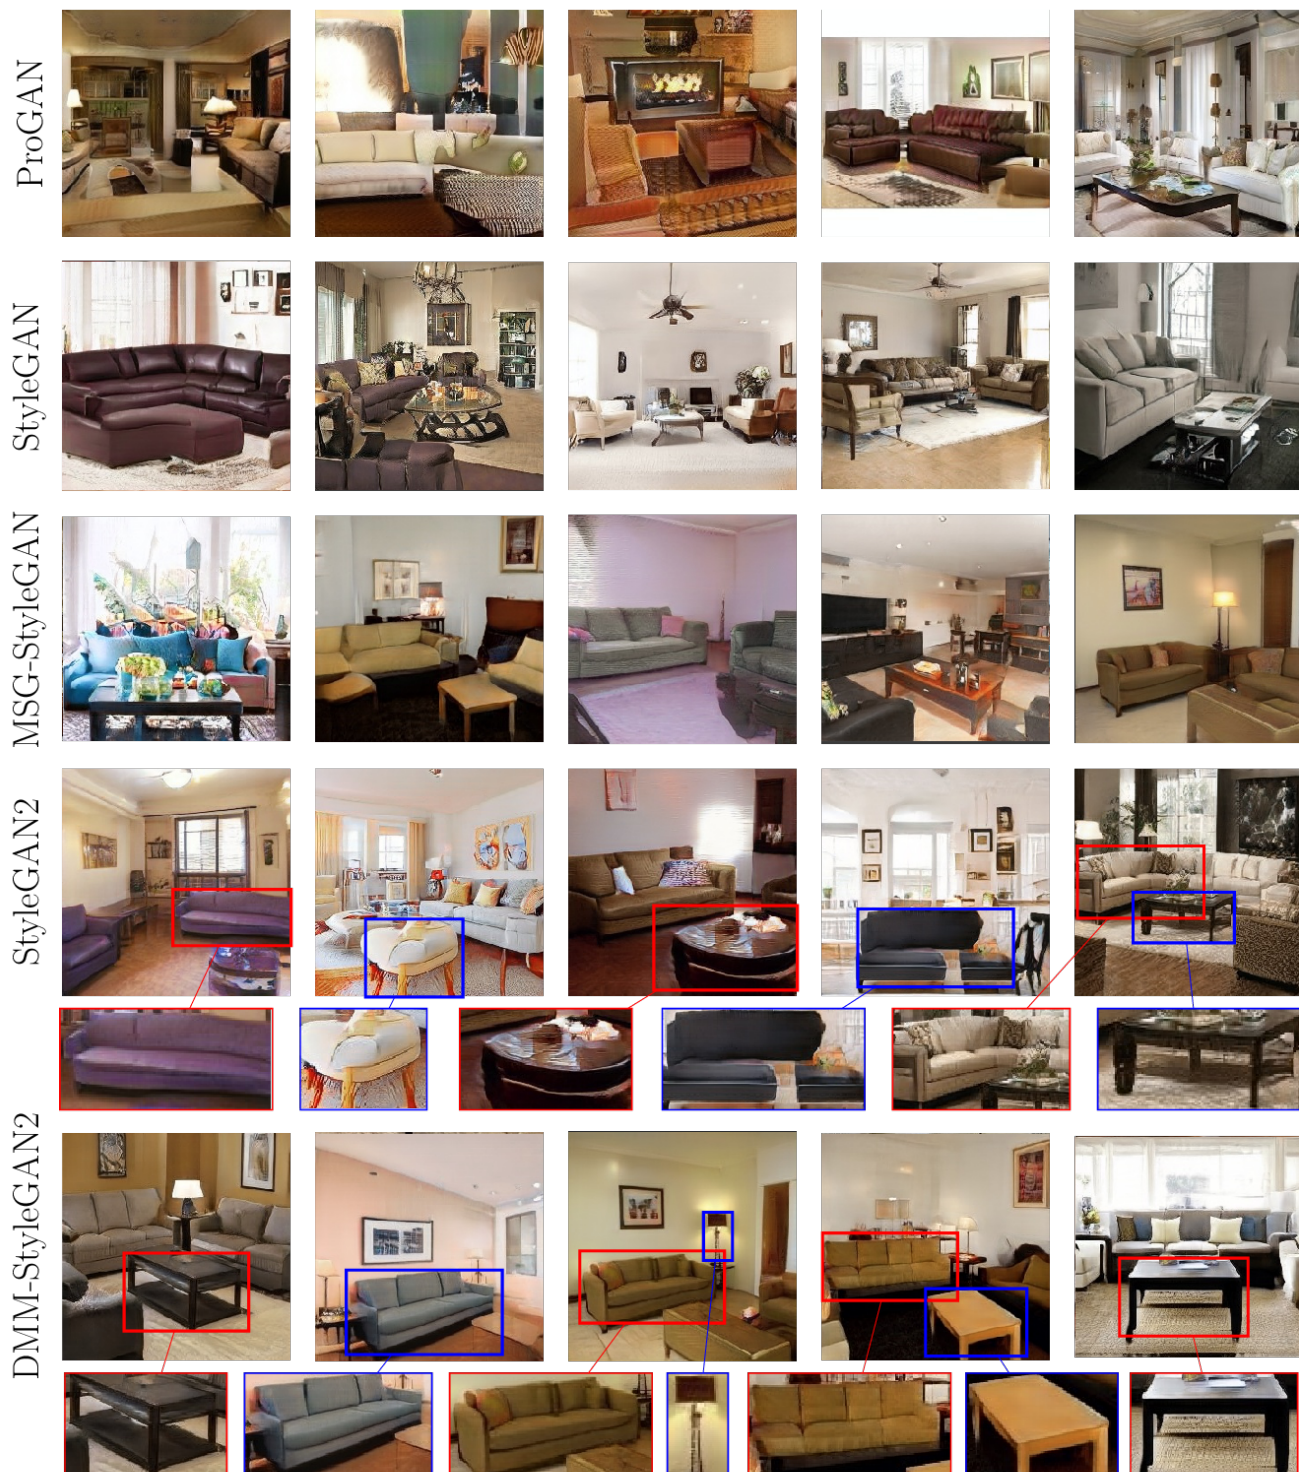

Figure 7: Comparative results on LSUN-LivingRoom dataset at  $256 \times 256$  resolution.
